# Supplementary material
Source: publisher figshare collection journal article supplement (https://asha.figshare.com/articles/dataset/_/26409088)
Supplement: Supplementary file 1 [file 1]

**Supplemental Material S1.** Exact values of the descriptive data per group (NH, HA users, and CI users) and results for one-way ANOVA or Kruskal–Wallis for the primary task in the baseline- and dual-task condition.

| Variable                                       | NH            |            |              | HA users      |            |              | CI users      |            |              | Results               |          |
|------------------------------------------------|---------------|------------|--------------|---------------|------------|--------------|---------------|------------|--------------|-----------------------|----------|
|                                                | <i>M (SD)</i> | <i>Mdn</i> | Range        | <i>M (SD)</i> | <i>Mdn</i> | Range        | <i>M (SD)</i> | <i>Mdn</i> | Range        | Test Statistic        | <i>p</i> |
| Baseline condition                             |               |            |              |               |            |              |               |            |              |                       |          |
| Primary task - quiet listening condition (%)   | 99.14 (2.27)  | 100.00     | 93.33-100.00 | 95.70 (7.00)  | 100.00     | 80.00-100.00 | 96.56 (5.68)  | 100.00     | 80.00-100.00 | $\chi^2(2) = 5.01$    | .082     |
| Primary task - favorable noise condition (%)   | 98.49 (3.32)  | 100.00     | 86.67-100.00 | 90.54 (12.86) | 93.33      | 53.33-100.00 | 90.75 (9.38)  | 93.33      | 66.67-100.00 | $\chi^2(2) = 15.53$   | < .001   |
| Primary task - unfavorable noise condition (%) | 88.17 (11.64) | 93.33      | 60.00-100.00 | 44.30 (22.94) | 46.67      | 0.00-93.33   | 43.44 (17.20) | 40.00      | 6.67-86.67   | $F(2, 55.80) = 93.06$ | < .001   |
| Dual-task condition                            |               |            |              |               |            |              |               |            |              |                       |          |
| Primary task - quiet condition (%)             | 96.13 (5.38)  | 100.00     | 80.00-100.00 | 94.41 (5.99)  | 93.33      | 73.33-100.00 | 94.19 (7.45)  | 100.00     | 73.33-100.00 | $\chi^2(2) = 1.75$    | 0.416    |
| Primary task - favorable noise condition (%)   | 97.63 (5.32)  | 100.00     | 73.33-100.00 | 90.97 (13.61) | 100.00     | 53.33-100.00 | 93.12 (7.40)  | 93.33      | 73.33-100.00 | $\chi^2(2) = 7.92$    | 0.019    |
| Primary task - unfavorable noise condition (%) | 86.02 (10.52) | 86.67      | 60.00-100.00 | 46.44 (17.90) | 46.67      | 13.33-93.33  | 53.11 (17.98) | 53.33      | 6.67-80.00   | $F(2, 88) = 55.07$    | < 0.001  |

*Note.* In the favorable noise condition, an SNR of +4 dB was applied; in the unfavorable noise condition, an SNR of -6 dB was applied.
