# Supplementary material
Source: publisher figshare collection journal article supplement (https://asha.figshare.com/articles/dataset/_/26409088)
Supplement: Supplementary file 2 [file 1]

**Supplemental Material S2.** Exact values of the descriptive data per group (NH, HA users, and CI users) and results for one-way ANOVA for the secondary task in the baseline- and dual-task condition.

| Variable                                         | NH            |            |              | HA users      |            |              | CI users      |            |              | Results            |          |
|--------------------------------------------------|---------------|------------|--------------|---------------|------------|--------------|---------------|------------|--------------|--------------------|----------|
|                                                  | <i>M (SD)</i> | <i>Mdn</i> | Range        | <i>M (SD)</i> | <i>Mdn</i> | Range        | <i>M (SD)</i> | <i>Mdn</i> | Range        | Test Statistic     | <i>p</i> |
| Baseline condition                               |               |            |              |               |            |              |               |            |              |                    |          |
| Secondary visual memory task (%)                 | 92.26 (11.17) | 100.00     | 60.00-100.00 | 88.06 (13.27) | 90.00      | 60.00-100.00 | 90.97 (9.44)  | 90.00      | 70.00-100.00 | $\chi^2(2) = 2.06$ | .357     |
| Dual-task condition                              |               |            |              |               |            |              |               |            |              |                    |          |
| Secondary task - quiet condition (%)             | 73.12 (15.63) | 73.33      | 33.33-93.33  | 67.31 (12.45) | 66.67      | 46.67-93.33  | 66.67 (15.10) | 66.67      | 40.00-93.33  | $F(2, 90) = 1.87$  | .160     |
| Secondary task - favorable noise condition (%)   | 83.01 (13.09) | 86.67      | 53.33-100.00 | 74.84 (13.63) | 73.33      | 46.67-100.00 | 75.05 (15.77) | 73.33      | 46.67-100.00 | $F(2, 90) = 3.33$  | .040     |
| Secondary task - unfavorable noise condition (%) | 68.82 (16.00) | 73.33      | 40.00-93.33  | 65.78 (13.07) | 66.67      | 33.33-93.33  | 63.56 (17.92) | 63.33      | 33.33-93.33  | $F(2, 88) = 0.86$  | .429     |

*Note.* In the favorable noise condition, an SNR of +4 dB was applied; in the unfavorable noise condition, an SNR of -6 dB was applied.
