# Supplementary material
Source: publisher figshare collection journal article supplement (https://asha.figshare.com/articles/dataset/_/26409088)
Supplement: Supplementary file 3 [file 1]

**Supplemental Material S3.** Exact values of the descriptive data per group (NH, HA users, and CI users) and results for one-way ANOVA or Kruskal–Wallis for the dual-task effect (DTE =  $100 \times [\text{score in dual-task condition} - \text{score in baseline condition}]/\text{score in baseline condition}$ ).

| Variable                                         | NH                     |            |              | HA users               |            |               | CI users               |            |               | Results            |          |
|--------------------------------------------------|------------------------|------------|--------------|------------------------|------------|---------------|------------------------|------------|---------------|--------------------|----------|
|                                                  | <i>M</i> ( <i>SD</i> ) | <i>Mdn</i> | Range        | <i>M</i> ( <i>SD</i> ) | <i>Mdn</i> | Range         | <i>M</i> ( <i>SD</i> ) | <i>Mdn</i> | Range         | Test Statistic     | <i>p</i> |
| DTE primary task - quiet condition               | -3.04 (4.93)           | 0.00       | -14.29-7.14  | -1.09 (6.29)           | 0.00       | -15.38-16.67  | -2.36 (6.81)           | 0.00       | -20.00-7.69   | $F(2, 90) = 0.83$  | .441     |
| DTE primary task - favorable noise condition     | -0.84 (5.09)           | 0.00       | -21.43-7.69  | 0.79 (9.49)            | 0.00       | -16.67-27.27  | 3.30 (10.13)           | 0.00       | -13.33-30.00  | $\chi^2(2) = 2.87$ | .238     |
| DTE primary task - unfavorable noise condition   | -1.57 (12.09)          | 0.00       | -21.43-33.33 | 19.46 (63.23)          | 0.00       | -57.14-250.00 | 22.59 (37.79)          | 16.67      | -50.00-100.00 | $\chi^2(2) = 9.61$ | .008     |
| DTE secondary task - quiet condition             | -19.91 (17.54)         | -20.00     | -66.67-11.11 | -22.86 (12.55)         | -20.00     | -48.15-0.00   | -26.19 (17.46)         | -26.67     | -60.00-14.29  | $F(2, 90) = 1.19$  | .308     |
| DTE secondary task - favorable noise condition   | -9.13 (15.43)          | -6.67      | -40.00-25.00 | -13.74 (17.03)         | -16.67     | -46.67-33.33  | -16.74 (19.64)         | -18.52     | -48.15-42.86  | $F(2, 90) = 1.50$  | .229     |
| DTE secondary task - unfavorable noise condition | -24.82 (17.71)         | -26.67     | -53.33-11.11 | -24.38 (16.58)         | -25.83     | -53.33-11.11  | -30.47 (19.40)         | -33.33     | -62.96-23.81  | $F(2, 88) = 1.08$  | .343     |

*Note.* In the favorable noise condition, an SNR of +4 dB was applied; in the unfavorable noise condition, an SNR of -6 dB was applied.
